# Supplementary material
Source: PubMed Central journal article supplement (PMC6643545)
Supplement: ao7b00820_si_001.pdf [file ao7b00820_si_001.pdf]

**Supplementary Information for:**

**Micelle Maker: An Online Tool for Generating Equilibrated Micelles  
as Direct Input for Molecular Dynamics Simulations**

Dennis M. Krüger<sup>1</sup> & Shina C. L. Kamerlin<sup>1,\*</sup>

1. Science for Life Laboratory, Department of Cell and Molecular Biology, Uppsala University, Uppsala Biomedical Center, Box 596, S-754 21 Uppsala, Sweden.

Corresponding author email address: [kamerlin@icm.uu.se](mailto:kamerlin@icm.uu.se)

## Table of Contents

|                                                                    |           |
|--------------------------------------------------------------------|-----------|
| <b>Supplementary Tables.....</b>                                   | <b>S2</b> |
| Table S1. Parameters calculated from micelle test simulations..... | S2        |
| Table S2. Micelle parameters from the literature.....              | S4        |
| <b>References.....</b>                                             | <b>S6</b> |

**Table S1:** Computational data calculated from MD simulations based on micelles generated with Micelle Maker, and corresponding experimental radii.<sup>a</sup>

| Detergents                     | $\beta$ -OM  | $\beta$ -OG  | $\beta$ -NG   | $\beta$ -DM |
|--------------------------------|--------------|--------------|---------------|-------------|
| <b>No. lipids</b>              | 47           | 90           | 133           | 69          |
| <b>Salt c</b>                  | 0.1          | 0.1          | 0.1           | 0.1         |
| <b>Tail carbons</b>            | 8            | 8            | 9             | 10          |
| <b>Rh</b>                      | 24±2         | n.a.         | n.a.          | 29±5        |
| <b>Rs</b>                      | 24.73±0.39   | 25.64±0.28   | 29.78±0.26    | 28.68±0.34  |
| <b>ROG</b>                     | 19.16±0.31   | 19.86±0.22   | 23.07±0.20    | 22.22±0.26  |
| <b>SASA</b>                    | 5631±277     | 9022±277     | 12133±430     | 7717±312    |
| <b>1<sup>st</sup> Ionshell</b> | 1.0±1.0      | 0.9±0.9      | 1.2±1.1       | 1.2±1.1     |
| <b>2<sup>nd</sup> Ionshell</b> | 2.6±1.5      | 2.5±1.5      | 3.4±1.8       | 3.1±1.7     |
| <b>I ratio</b>                 | 1.27±0.10    | 1.32±0.11    | 1.37±0.10     | 1.24±0.09   |
| <b>ecc</b>                     | 0.117±0.042  | 0.142±0.049  | 0.153±0.045   | 0.109±0.039 |
| <b>Dc_h</b>                    | 0.038±0.018  | 0.599±0.213  | 0.270±0.352   | 0.035±0.004 |
| <b>Dc_t</b>                    | 0.018±0.008  | 0.105±0.008  | 0.060±0.056   | 0.011±0.001 |
|                                |              |              |               |             |
| Detergents                     | $\beta$ -DDM | $\beta$ -DDM | $\alpha$ -DDM | SDS         |
| <b>No. lipids</b>              | 98           | 110          | 98            | 62          |
| <b>Salt c</b>                  | 0.15         | 0.15         | 0.15          | 0.15        |
| <b>Tail carbons</b>            | 12           | 12           | 12            | 12          |
| <b>Rh</b>                      | 33±5         | n.a.         | n.a.          | n.a.        |
| <b>Rs</b>                      | 33.14±0.38   | 34.71±0.41   | 32.29±0.24    | 25.82±0.34  |
| <b>ROG</b>                     | 25.67±0.30   | 26.89±0.31   | 25.01±0.19    | 20.00±0.26  |
| <b>SASA</b>                    | 10365±391    | 11170±496    | 9231±416      | 9683±294    |
| <b>1st Ionshell</b>            | 2.5±1.6      | 2.7±1.6      | 2.4±1.5       | 18.9±3.5    |
| <b>2nd Ionshell</b>            | 6.2±2.3      | 6.7±2.4      | 6.0±2.3       | 34.5±3.5    |
| <b>I ratio</b>                 | 1.20±0.08    | 1.25±0.08    | 1.18±0.06     | 1.27±0.10   |
| <b>ecc</b>                     | 0.093±0.036  | 0.113±0.035  | 0.083±0.031   | 0.121±0.046 |
| <b>Dc_h</b>                    | 0.030±0.013  | 0.03±0.003   | 0.027±0.004   | 4.102±0.137 |
| <b>Dc_t</b>                    | 0.012±0.006  | 0.014±0.004  | 0.012±0.001   | 0.102±0.041 |

<sup>a</sup>**No. lipids:** Number of lipids. **Salt c:** Salt concentration in mol/l. **Rh:** Hydrodynamic radius in Å, experimentally determined by dynamic light scattering.<sup>1</sup> **Rs:** Effective micellar radius in Å, calculated by  $ROG * (5/3)^{0.5}$ .<sup>2</sup> **ROG:** Radius of gyration in Å calculated with CPPTRAJ. **SASA:** Solvent Accessible Surface Area in Å<sup>2</sup> calculated with CPPTRAJ, based on specified atoms using the linear combinations of pairwise overlaps (LCPO) algorithm of Weiser *et al.*<sup>3</sup> **1<sup>st</sup> and 2<sup>nd</sup> ion shells:** number of ions within 3.4 and 5.0Å of the micelle, respectively, using default cutoffs. **I:** Principle moments of inertia calculated with

CPPTRAJ, where the eigenvalues of the principle axes of each simulation frame are determined by diagonalization of the inertial matrix from the coordinates of the specified atoms. **I ratio:**  $I_{\max}/I_{\min}$ . **ecc:** Eccentricity calculated by  $1 - (I_{\min}/I_{\text{avg}})^2$ . **Dc\_h:** Diffusion coefficients for lipid head groups calculated with CPPTRAJ in  $1 \times 10^{-5}$  cm<sup>2</sup> /s using the Einstein relation. **Dc\_t:** Diffusion coefficients for tails calculated with CPPTRAJ in  $1 \times 10^{-5}$  cm<sup>2</sup> using the Einstein relation. For a definition of lipid abbreviations, see either **Table S2** or **Table 1** of the main text.

**Table S2:** Summary of available experimental data for the mass, critical micelle concentration and aggregation numbers of the lipids that can be modelled by Micelle Maker at the time of publication.<sup>a</sup>

| Lipid type                                                             | Mass [Da] | CMC [mM/L]                                                   | Aggregation number                 | Reference |
|------------------------------------------------------------------------|-----------|--------------------------------------------------------------|------------------------------------|-----------|
| <b>Heptyl-<math>\alpha</math>-D-glucopyranoside</b><br>( $\alpha$ -HG) | 278       | n.a.                                                         | n.a.                               | n.a.      |
| <b>Heptyl-<math>\beta</math>-D-glucopyranoside</b><br>( $\beta$ -HG)   | 278       | ~70 (H <sub>2</sub> O)                                       | n.a.                               | 4         |
| <b>Heptyl-<math>\alpha</math>-D-maltopyranoside</b><br>( $\alpha$ -HM) | 443       | n.a.                                                         | n.a.                               | n.a.      |
| <b>Heptyl-<math>\beta</math>-D-maltopyranoside</b><br>( $\beta$ -HM)   | 443       | n.a.                                                         | n.a.                               | n.a.      |
| <b>Octyl-<math>\alpha</math>-D-glucopyranoside</b><br>( $\alpha$ -OG)  | 292       | ~10-21 (H <sub>2</sub> O)                                    | n.a.                               | 5         |
| <b>Octyl-<math>\beta</math>-D-glucopyranoside</b><br>( $\beta$ -OG)    | 292       | ~18-20 (H <sub>2</sub> O)/<br>23.4 (0.1M NaCl)               | ~27-100/~90                        | 5-8       |
| <b>Octyl-<math>\alpha</math>-D-maltopyranoside</b><br>( $\alpha$ -OM)  | 454       | n.a.                                                         | n.a.                               | n.a.      |
| <b>Octyl-<math>\beta</math>-D-maltopyranoside</b><br>( $\beta$ -OM)    | 454       | 19.5 (100mM NaCl, 20mM HEPES pH7.5)                          | ~47                                | 5         |
| <b>Nonyl-<math>\alpha</math>-D-glucopyranoside</b><br>( $\alpha$ -NG)  | 306       | n.a.                                                         | n.a.                               | n.a.      |
| <b>Nonyl-<math>\beta</math>-D-glucopyranoside</b><br>( $\beta$ -NG)    | 306       | ~6.5 (H <sub>2</sub> O)/ ~6 (0.15M NaCl)/ 3.5(1M NaCl)       | ~133                               | 4-5       |
| <b>Nonyl-<math>\alpha</math>-D-maltopyranoside</b><br>( $\alpha$ -NM)  | 469       | n.a.                                                         | n.a.                               | n.a.      |
| <b>Nonyl-<math>\beta</math>-D-maltopyranoside</b><br>( $\beta$ -NM)    | 469       | ~6 (H <sub>2</sub> O)                                        | ~55 (100mM NaCl, 20mM HEPES pH7.5) | 5         |
| <b>Decyl-<math>\alpha</math>-D-glucopyranoside</b><br>( $\alpha$ -DG)  | 320       | n.a.                                                         | n.a.                               | n.a.      |
| <b>Decyl-<math>\beta</math>-D-glucopyranoside</b><br>( $\beta$ -DG)    | 320       | ~2.2 (H <sub>2</sub> O)/ ~2.3 (0.01M PO <sub>4</sub> Buffer) | n.a.                               | 9-10      |
| <b>Decyl-<math>\alpha</math>-D-maltopyranoside</b><br>( $\alpha$ -DM)  | 483       | ~1.66 (H <sub>2</sub> O)                                     | n.a.                               | 5         |
| <b>Decyl-<math>\beta</math>-D-maltopyranoside</b><br>( $\beta$ -DM)    | 483       | ~1.8 (H <sub>2</sub> O)/ ~1.8 (0.15M NaCl)                   | ~69                                | 5, 11     |

|                                                                          |     |                                                   |                                       |          |
|--------------------------------------------------------------------------|-----|---------------------------------------------------|---------------------------------------|----------|
| <b>Undecyl-<math>\alpha</math>-D-glucopyranoside</b><br>( $\alpha$ -UDG) | 334 | n.a.                                              | n.a.                                  | n.a.     |
| <b>Undecyl-<math>\beta</math>-D-glucopyranoside</b><br>( $\beta$ -UDG)   | 334 | n.a.                                              | n.a.                                  | n.a.     |
| <b>Undecyl-<math>\alpha</math>-D-maltopyranoside</b><br>( $\alpha$ -UDM) | 497 | 0.58 (H <sub>2</sub> O)                           | n.a.                                  | 5        |
| <b>Undecyl-<math>\beta</math>-D-maltopyranoside</b><br>( $\beta$ -UDM)   | 497 | ~0.59 (H <sub>2</sub> O)                          | ~71 (100mM NaCl,<br>20mM HEPES pH7.5) | 5        |
| <b>Dodecyl-<math>\alpha</math>-D-glucopyranoside</b><br>( $\alpha$ -DDG) | 349 | n.a.                                              | n.a.                                  | n.a.     |
| <b>Dodecyl-<math>\beta</math>-D-glucopyranoside</b><br>( $\beta$ -DDG)   | 349 | ~0.19 (H <sub>2</sub> O)                          | n.a.                                  | 10       |
| <b>Dodecyl-<math>\alpha</math>-D-maltopyranoside</b><br>( $\alpha$ -DDM) | 511 | ~0.152 (H <sub>2</sub> O)                         | ~90                                   | 12       |
| <b>Dodecyl-<math>\beta</math>-D-maltopyranoside</b><br>( $\beta$ -DDM)   | 511 | ~0.17 (H <sub>2</sub> O)/<br>~0.12 (0.2M<br>NaCl) | ~78-149/110-140                       | 5, 7, 12 |
| <b>Sodium-dodecyl-sulfate</b><br>(SDS)                                   | 288 | 1.2-7.1 (H <sub>2</sub> O)                        | 62-101                                | 7        |

<sup>a</sup> n.a. = not available, no reference found

## References

1. Meyer, A.; Dierks, K.; Hussein, R.; Brillet, K.; Brognaro, H.; Betzel, C., Systematic analysis of protein-detergent complexes applying dynamic light scattering to optimize solutions for crystallization trials. *Acta Cryst.* **2015**, *F71*, 75-81.
2. Bruse, C. D.; Berkowitz, M. L.; Perera, L.; Forbes, M. D. E., Molecular dynamics simulations of sodium dodecyl sulfate micelle in water: Micellar structural characteristics and counterion distribution. *J. Phys. Chem. B* **2002**, *106*, 3788-3793.
3. Weiser, J.; Shenkin, P.; Still, W., Approximate atomic surfaces from linear combinations of pairwise overlaps (LCPO). *J. Comput. Chem.* **1999**, *20*, 217-230.
4. Zer, H.; Vink, M.; Shochat, S.; Herrmann, R. G.; Andersson, B.; Ohad, I., Light affects the accessibility of the thylakoid light harvesting complex II (LHCII) phosphorylation site to the membrane protein kinase(s). *Biochemistry* **2003**, *42*, 728-738.
5. Anatrace Inc., Measurement by Anatrace Inc.
6. Chattopadhyay, A.; London, E., Fluorometric determination of critical micelle concentration avoiding interference from detergent charge. *Anal. Biochem.* **1984**, *139*, 408-412.
7. le Maire, M.; Champeil, P.; Moller, J. V., Interaction of membrane proteins and lipids with solubilizing detergents. *Biochim. Biophys. Acta* **2000**, *1508*, 86-111.
8. Lorber, B.; Bishop, J. B.; DeLucas, L. J., Purification of octyl beta-D-glucopyranoside and re-estimation of its micellar size. *Biochim. Biophys. Acta* **1990**, *1023*, 254-265.
9. Brito, R. M. M.; Vaz, W. L. C., Determination of the critical micelle concentration of surfactants using the fluorescent-probe-N-phenyl-1-naphthylamine. *Anal. Biochem.* **1986**, *152*, 250-255.
10. Helenius, A.; McCaslin, D. R.; Fries, E.; Tanford, C., Properties of detergents. *Methods Enzymol.* **1979**, *56*, 734-739.
11. Alpes, H.; Apell, H.-J.; Knoll, G.; Plattner, H.; Riek, R., Reconstitution of Na<sup>+</sup>/K<sup>+</sup>-ATPase into phosphatidylcholine vesicles by dialysis of nonionic alkyl maltoside detergents. *Biochim. Biophys. Acta* **1988**, *946*, 379-388.
12. VanAken, T.; Foxall-VanAken, S.; Castleman, S.; Ferguson-Miller, S., Alkyl glycoside detergents: synthesis and applications to the study of membrane proteins. *Methods Enzymol.* **1986**, *125*, 27-35.
